# Supplementary material
Source: publisher figshare collection journal article supplement (https://frontiersin.figshare.com/ndownloader/files/31415518)
Supplement: Supplementary file 1 [file 31415518]

## Supplementary Material

| Station name | Latitude (°N) | Longitude (°E) | Elevation (m) |
|--------------|---------------|----------------|---------------|
| CORR         | 44.90190      | 11.00944       | 20            |
| ROCC         | 44.90000      | 10.92417       | 17            |
| ROVE         | 44.85307      | 10.94972       | 21            |
| SGIA         | 44.85917      | 11.03583       | 20            |

**Table S1.** List of the four local network VO stations: names, coordinates in degrees, and elevation in m from sea level.

| Station name | Latitude (°N) | Longitude (°E) | Elevation (m) |
|--------------|---------------|----------------|---------------|
| CAVE         | 44.86580      | 11.00310       | 18            |
| FERS         | 44.90350      | 11.54060       | 3             |
| FIU          | 44.64031      | 11.49165       | 12            |
| MNTV         | 45.14950      | 10.78970       | 36            |
| MODE         | 44.62972      | 10.94917       | 41            |
| NDIM         | 44.88730      | 10.89870       | 19            |
| OPPE         | 45.30820      | 11.17240       | 20            |
| RAVA         | 44.75587      | 11.11880       | 15            |
| SBPO         | 45.05108      | 10.91987       | 10            |
| SERM         | 45.00997      | 11.29582       | 7             |

**Table S2.** List of the ten Italian Seismic Network IV stations: names, coordinates in degrees, and elevation in m from sea level.

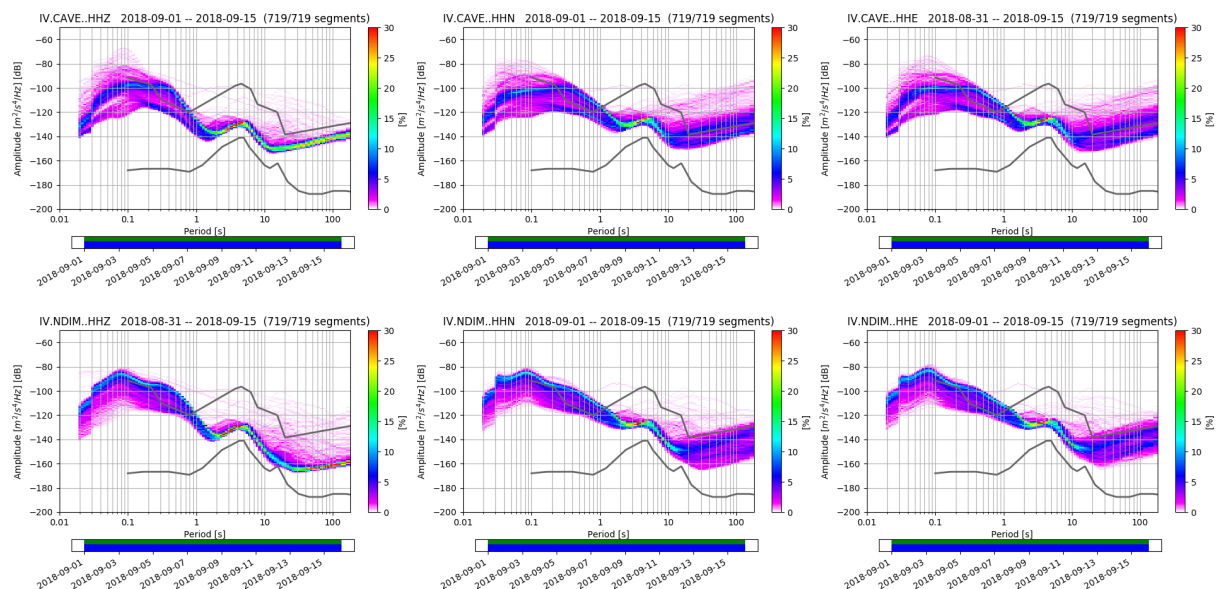

**Figure S1.** Power Spectral Densities for the 2 IV stations CAVE and NDIM at their 3 components. Each row correspond to a station (in alphabetical order from top to bottom): CORR, ROCC, ROVE, SGIA; and each column to a component: EHZ, EHN, EHE (from left to right). The black lines highlight the NHHM and NLNM curves defined by Peterson (1993). The blue/green bar on the bottom shows the data under analysis (blue), and the data availability (in green), at that particular station/channel, they are coincident since we took all available data in this case.

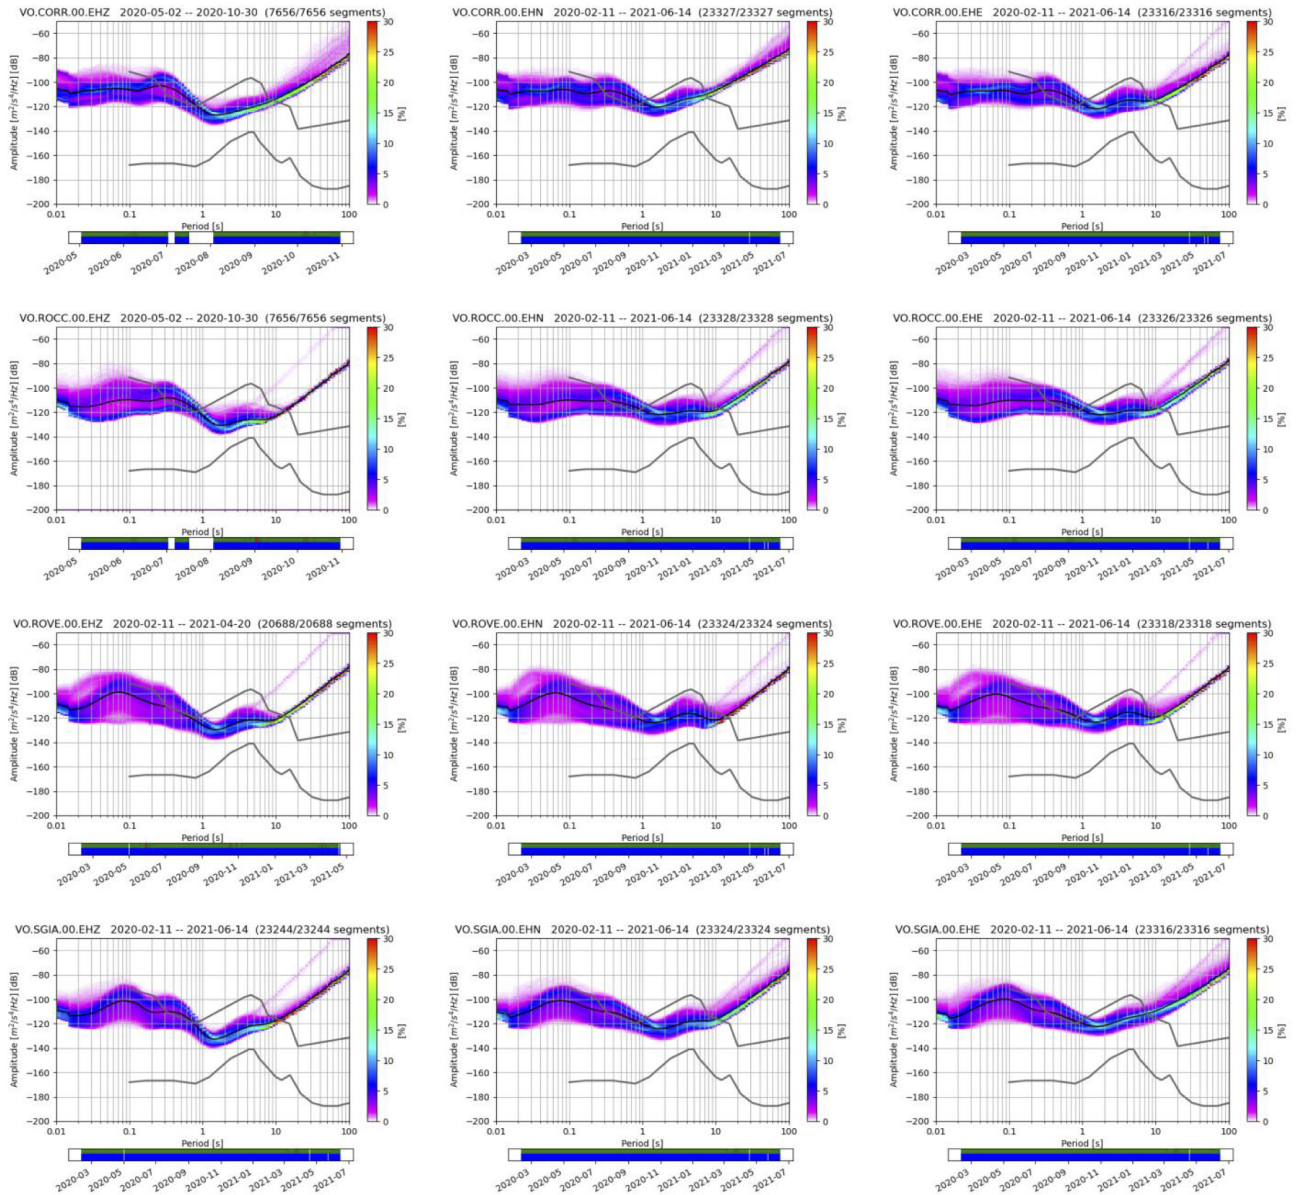

**Figure S2.** Power Spectral Densities for the 4 VO stations at their 3 components, obtained from the continuous data we could profit after the local network improvement operated on December 2018. Each row correspond to a station (in alphabetical order from top to bottom): CORR, ROCC, ROVE, SGIA; and each column to a component: EHZ, EHN, EHE (from left to right). The black lines highlight the NHNM and NLNM curves defined by Peterson (1993). The blue/green bar on the bottom shows the data under analysis (blue), and the data availability (in green), at that particular station/channel, they are coincident since we took all available data in this case.

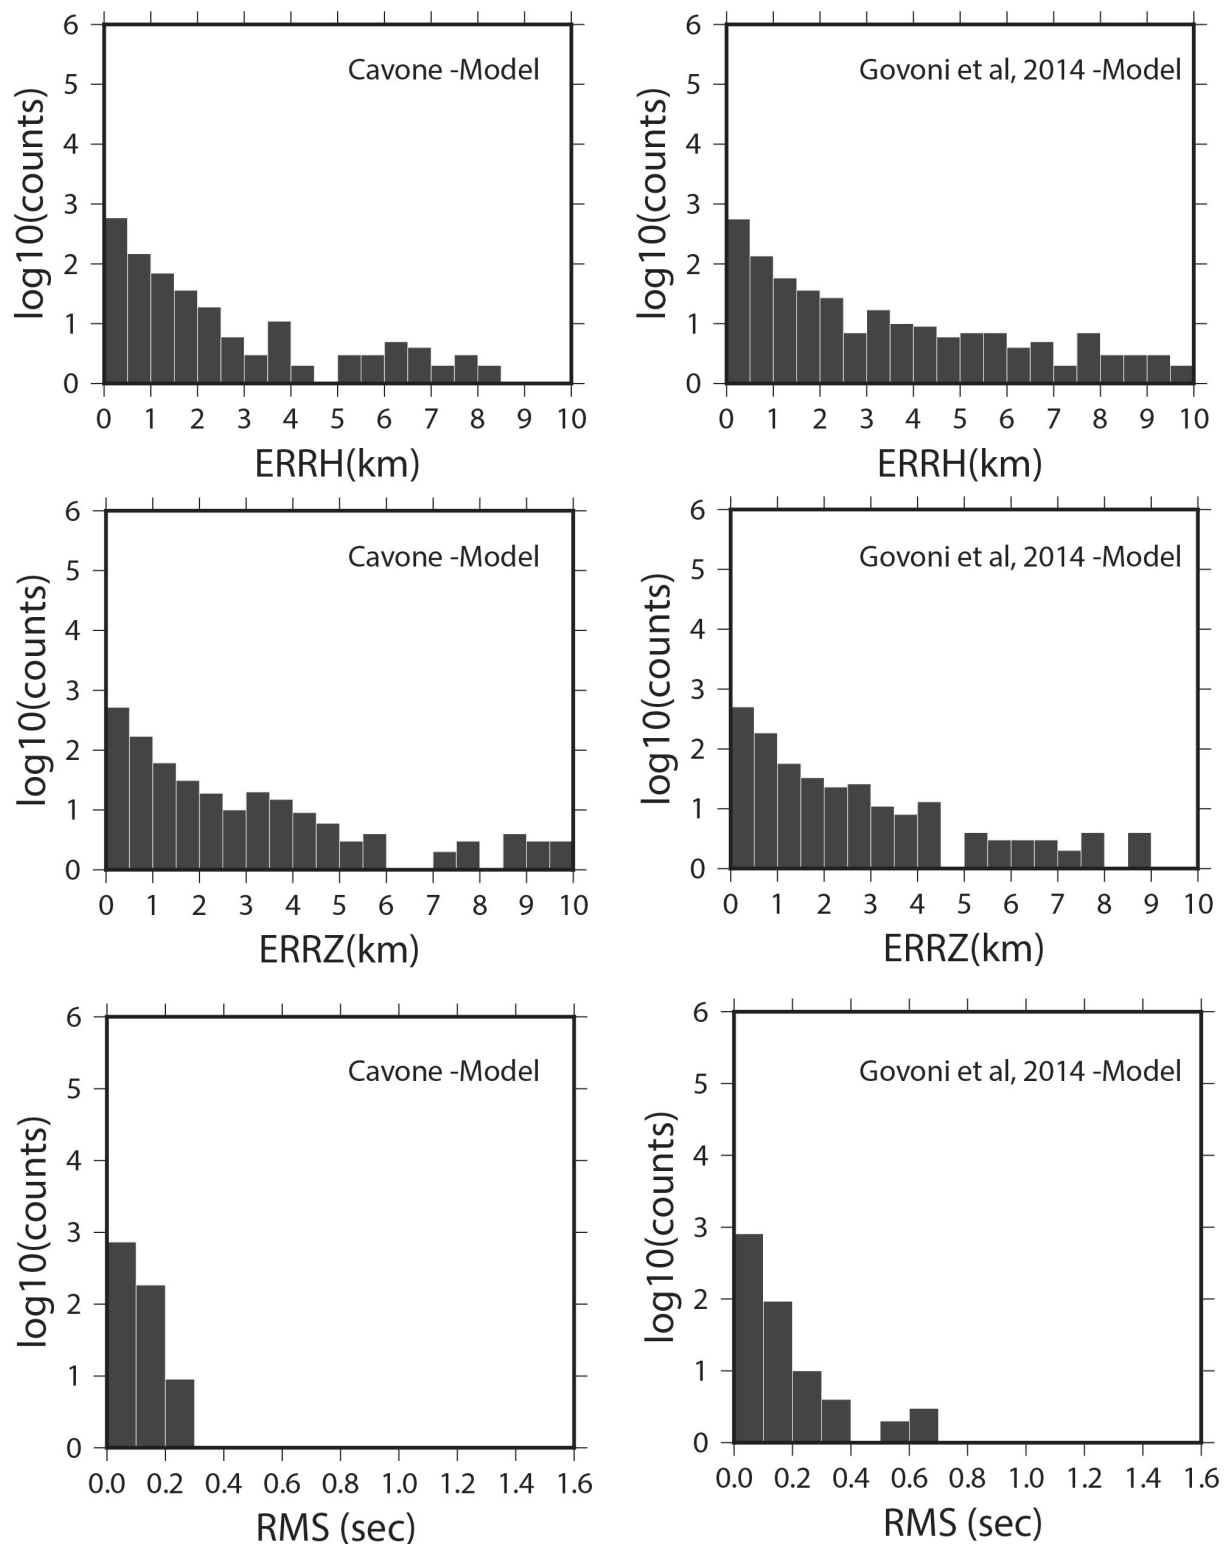

**Figure S3.** The histograms report the measurement errors associated to the location of thousands of seismic events detected during the 2012 Emilia sequence. From top to bottom we show the comparison of horizontal and vertical errors, and RMS values, respectively, obtained for the two velocity models available for this area. On the left column the “Cavone-Model”, the local velocity model created ad-hoc for the Cavone oil field owned by the operator (reported in the Supplementary Table 3). On the right column the Govoni et al. (2014) one generated on the basis of the 2012 Emilia earthquake sequence (“Govoni et al 2014-Model”).

| $v_P$ (km/s) | Depth (km) | $v_P/v_S$ |
|--------------|------------|-----------|
| 1.7          | 0          | 1.73      |
| 2.1          | 0.2        | 1.73      |
| 2.7          | 1.5        | 1.73      |
| 5.0          | 5.5        | 1.73      |
| 6.3          | 11         | 1.73      |
| 8.2          | 24         | 1.73      |

**Table S3.** Velocity model for the Cavone oil field as provided by the operator (Società Padana Energia, personal communication, 2018).

| N  | Date<br>yyyy-mo-dd hh:mi | Longitude<br>°E | Latitude<br>°N | Depth<br>km | errH<br>km | errZ<br>km | RMS<br>s | GAP<br>deg | Picks |
|----|--------------------------|-----------------|----------------|-------------|------------|------------|----------|------------|-------|
| 1  | 2018-03-03 20:12         | 11.1507         | 44.8317        | 7.82        | 0.3        | 0.5        | 0.23     | 252        | 12    |
| 2  | 2018-03-04 14:37         | 11.0108         | 44.8870        | 5.68        | 0.1        | 0.1        | 0.07     | 151        | 10    |
| 3  | 2018-03-07 15:10         | 11.1447         | 44.8448        | 6.86        | 0.3        | 1.0        | 0.13     | 251        | 10    |
| 4  | 2018-05-27 03:31         | 10.9633         | 44.8867        | 5.11        | 0.1        | 0.2        | 0.13     | 129        | 13    |
| 5  | 2018-08-03 21:14         | 10.9485         | 44.8915        | 5.44        | 0.3        | 0.2        | 0.08     | 140        | 13    |
| 6  | 2018-08-05 04:07         | 10.9523         | 44.8928        | 4.11        | 0.2        | 0.4        | 0.16     | 148        | 12    |
| 7  | 2018-08-27 04:08         | 10.9972         | 44.8845        | 5.93        | 0.3        | 0.4        | 0.06     | 112        | 9     |
| 8  | 2018-09-12 13:29         | 10.9740         | 44.8902        | 4.70        | 0.3        | 0.2        | 0.07     | 200        | 8     |
| 9  | 2018-09-15 20:00         | 10.9847         | 44.8918        | 5.54        | 0.4        | n.d.       | 0.05     | 211        | 6     |
| 10 | 2018-10-23 14:11         | 11.0147         | 44.8825        | 4.46        | 0.4        | 0.4        | 0.11     | 230        | 8     |
| 11 | 2018-11-24 02:04         | 10.9242         | 44.8932        | 5.47        | 0.4        | 0.2        | 0.05     | 104        | 12    |
| 12 | 2018-11-25 23:32         | 11.0232         | 44.8327        | 10.35       | 0.5        | 0.6        | 0.01     | 273        | 7     |
| 13 | 2018-12-11 19:24         | 11.0733         | 44.8943        | 6.98        | 0.7        | 0.7        | 0.14     | 247        | 10    |
| 14 | 2019-01-10 23:53         | 10.9607         | 44.8927        | 0.27        | 0.2        | n.d.       | 1.13     | 169        | 7     |
| 15 | 2019-01-17 01:03         | 10.9275         | 44.8865        | 6.89        | 0.6        | 0.8        | 0.07     | 125        | 8     |
| 16 | 2019-01-19 10:16         | 11.0187         | 44.9605        | 1.79        | 1.1        | n.d.       | 4.13     | 316        | 9     |
| 17 | 2019-03-03 15:21         | 11.0512         | 44.8780        | 5.39        | 1.3        | 0.2        | 0.03     | 313        | 6     |
| 18 | 2019-03-03 16:08         | 11.0398         | 44.8560        | 5.30        | 0.5        | 0.1        | 0.08     | 292        | 8     |
| 19 | 2019-03-07 02:30         | 11.0327         | 44.8617        | 5.94        | 0.5        | 0.5        | 0.15     | 160        | 11    |
| 20 | 2019-03-13 14:22         | 11.2145         | 44.8447        | 18.21       | 2.4        | 2.4        | 0.18     | 286        | 14    |
| 21 | 2019-03-23 03:53         | 10.9770         | 44.8807        | 5.88        | 1.2        | 1.4        | 0.04     | 262        | 6     |
| 22 | 2019-03-27 16:36         | 10.5940         | 44.8362        | 20.25       | 7.0        | 8.2        | 0.32     | 350        | 6     |
| 23 | 2019-05-04 23:01         | 11.2380         | 44.8582        | 17.10       | 0.7        | 1.6        | 0.21     | 205        | 11    |
| 24 | 2019-05-12 15:24         | 11.1037         | 44.8957        | 10.75       | 1.0        | 0.9        | 0.13     | 318        | 8     |
| 25 | 2019-05-28 20:07         | 11.0153         | 44.8805        | 5.73        | 0.7        | 0.4        | 0.03     | 237        | 6     |
| 26 | 2019-06-16 10:49         | 10.9988         | 44.8593        | 7.11        | 0.3        | 0.5        | 0.06     | 170        | 9     |
| 27 | 2019-06-18 00:57         | 11.0137         | 44.8582        | 7.65        | 0.3        | 0.5        | 0.10     | 177        | 11    |
| 28 | 2019-06-18 22:26         | 11.0202         | 44.8763        | 5.68        | 0.2        | 0.3        | 0.05     | 164        | 11    |
| 29 | 2019-06-30 17:49         | 11.0242         | 44.8768        | 5.42        | 0.3        | 0.1        | 0.16     | 173        | 13    |
| 30 | 2019-06-30 22:59         | 11.0233         | 44.8752        | 5.26        | 0.2        | 0.1        | 0.10     | 170        | 14    |
| 31 | 2019-07-13 04:18         | 10.9245         | 44.8928        | 5.41        | 0.3        | 0.1        | 0.06     | 105        | 10    |
| 32 | 2019-07-15 05:48         | 10.8757         | 44.8688        | 9.12        | 0.5        | 0.6        | 0.21     | 301        | 10    |
| 33 | 2019-07-18 00:13         | 10.6917         | 44.8217        | 11.11       | 1.7        | n.d.       | 0.23     | 343        | 11    |
| 34 | 2019-07-20 21:08         | 10.9245         | 44.8928        | 5.43        | 0.2        | 0.1        | 0.06     | 117        | 8     |
| 35 | 2019-07-27 11:11         | 10.9398         | 44.8895        | 6.31        | 0.1        | 0.4        | 0.08     | 123        | 13    |
| 36 | 2019-07-27 11:12         | 10.9437         | 44.8950        | 6.45        | 0.2        | 0.4        | 0.09     | 151        | 10    |
| 37 | 2019-07-31 22:49         | 11.0233         | 44.8197        | 8.63        | 0.3        | 0.6        | 0.14     | 169        | 14    |
| 38 | 2019-08-18 20:23         | 10.9723         | 44.8917        | 5.58        | 0.4        | 1.4        | 0.07     | 145        | 11    |
| 39 | 2019-08-26 04:02         | 10.8762         | 44.8667        | 8.98        | 0.6        | 0.6        | 0.06     | 291        | 7     |
| 40 | 2019-09-03 00:48         | 11.0017         | 44.8730        | 5.81        | 0.2        | 0.2        | 0.04     | 129        | 8     |
| 41 | 2019-09-03 02:49         | 11.0177         | 44.8710        | 6.13        | 0.3        | 0.4        | 0.06     | 143        | 10    |
| 42 | 2019-09-18 19:59         | 10.9062         | 44.8888        | 8.77        | n.d.       | n.d.       | 0.01     | 180        | 4     |
| 43 | 2019-09-18 20:00         | 10.9042         | 44.8892        | 8.91        | n.d.       | n.d.       | 0.01     | 180        | 4     |
| 44 | 2019-10-01 21:29         | 11.030          | 44.8767        | 5.39        | 0.4        | 0.1        | 0.05     | 196        | 8     |
| 45 | 2019-10-04 13:23         | 11.3345         | 44.8995        | 11.21       | 0.7        | n.d.       | 0.21     | 137        | 12    |
| 46 | 2019-10-31 08:22         | 11.0410         | 44.9650        | 13.89       | 5.4        | 6.7        | 0.49     | 324        | 7     |
| 47 | 2019-11-25 00:03         | 10.9127         | 44.8883        | 5.60        | 0.6        | 1.0        | 0.08     | 138        | 8     |
| 48 | 2019-12-03 08:42         | 10.9218         | 44.9023        | 6.91        | 0.8        | 0.9        | 0.16     | 219        | 9     |
| 49 | 2019-12-18 18:07         | 11.2583         | 44.8502        | 11.36       | 1.2        | n.d.       | 0.71     | 217        | 5     |

**Table S4.** List of the 49 earthquakes analysed during 2018-2019. The date is expressed in year-month-day, then we report location estimates (longitude, latitude and depths in km), horizontal and vertical errors on the location in km (errH and errZ respectively), RMS in seconds, azimuthal gap of the station used for locating the event, and number of picks used for location. We can observe that the events with less detected phase arrivals show the bigger errors in locations or even a not defined value ("n.d.").

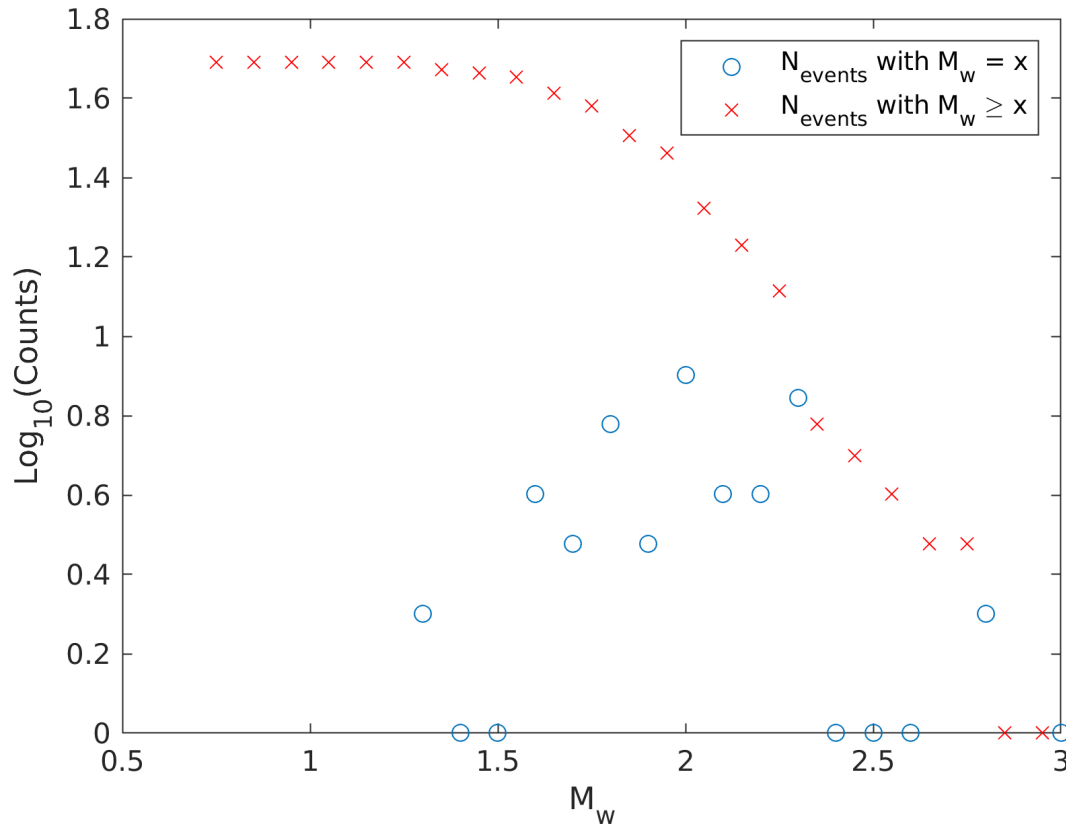

**Figure S4.** Logarithm of the event counted per moment magnitude  $M_W$ , the blue circles indicate all events with magnitude equal to  $M_W$  while the red crosses the number of events with magnitude equal or greater than  $M_W$  (the cumulated number of events). We test the stability of the completeness magnitude by performing the computation through three different methodologies: Marzocchi et al. (2016); Wiemer and Wyss (2000); Woessner and Wiemer (2005), and we obtain the same value of  $M_c = 2$

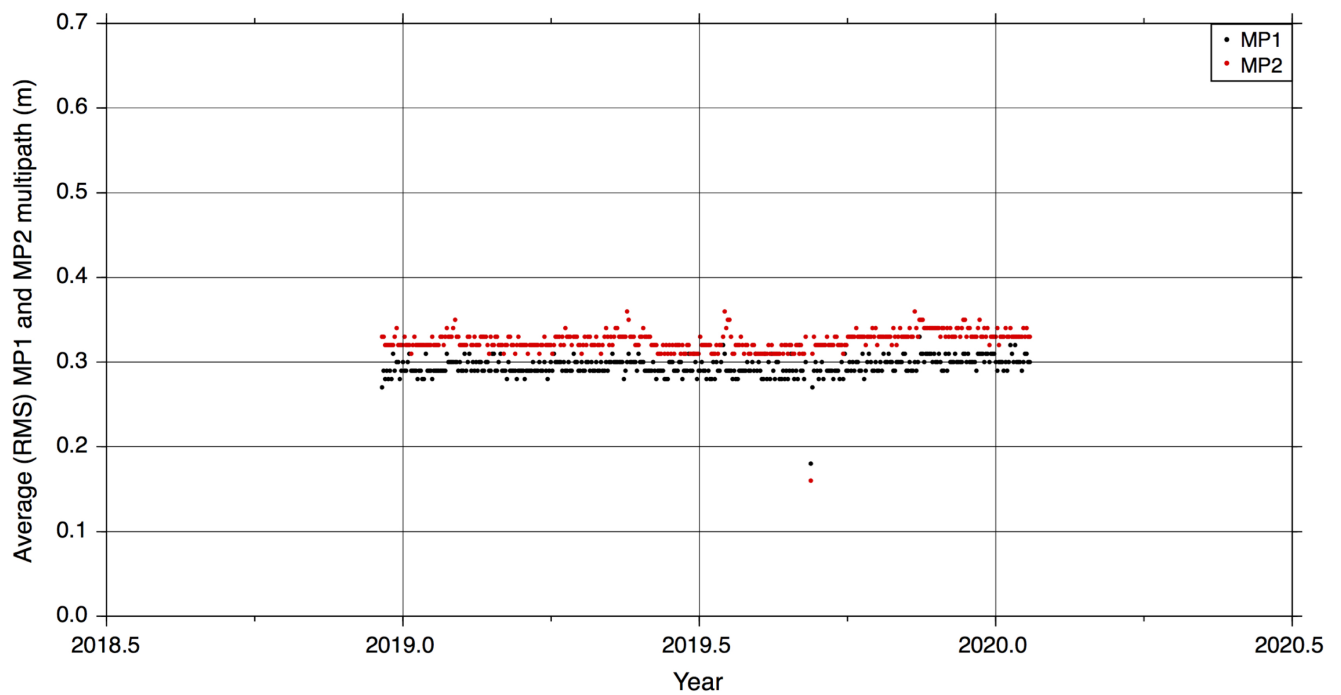

**Figure S5.** MP1 (black) and MP2 (red) values obtained from the analysis of the CAVO station data RINEX with TEQC software.

# 1 CORRELATIONS BETWEEN INDUSTRIAL ACTIVITY AND SEISMICITY

This method has been recently used for performing a large-scale screening to measure significant changes in background seismicity rates at the national scale in Italy (Garcia et al., 2021). The binomial test assumes independence between event occurrences, hence we first verify it on the inter-event times (IETs, defined as times between successive events) of the complete part of the catalog (as proposed in Bebbington, 2012). The results are shown as Figures S6 and S7, and support independence between the 10 seismic events, thus allowing us to reject a correlation between the duration of successive IETs. Let's call  $t_c$  the time at which a change (i.e., stop or re-start) in the industrial activity takes place; let  $T_{pre} = [t_1, t_c]$  be the time interval identified before the stop (re-start) of the activity, and  $T_{post} = [t_c, t_2]$  the time interval identified after the industrial activity stop (re-start). Let  $n_{pre}$  be the number of events that occurred in the period  $T_{pre}$ , and  $n_{post}$  the number of events that occurred in the period  $T_{post}$ . The total number of events in both periods is therefore  $N = n_{pre} + n_{post}$ . If the seismicity rate exhibit changes that are correlated with changes in the production trend before and after the time at which a change has occurred ( $t_c$ ), that is, if the seismicity rate during  $T_{pre}$  is significantly different from the seismicity rate during  $T_{post}$ , then the actual division of the total number of events  $N$  in both periods into  $n_{pre}$  and  $n_{post}$  should be significantly different from the division which could be attained at random. Therefore, if we hypothesise stationary seismicity, the proposed null hypothesis,  $H_0$ , states that (for more details see Leptokaropoulos et al., 2017; Garcia et al., 2021):

$H_0 : n_{post}$  can be obtained at random from  $N$  under probability  $P$

where  $P$  is related to the time partitions as follows:

$$P = \frac{T_{post}}{T_{pre} + T_{post}} \quad (S1)$$

This hypothesis is tested by means of the binomial test (e.g., Wonnacott and Wonnacott, 1977). If  $N$  events occur randomly in the whole interval  $[t_1, t_2]$ , this test provides (i) the probability  $p_1$  that the number of events in the interval  $[t_c, t_2]$  is less than or equal to  $n_{post}$ ,

$$p_1 = Pr\{n \leq n_{post} | N, P\} = \sum_{n=0}^{n_{post}} \binom{N}{n} P^n (1-P)^{N-n} \quad (S2)$$

or (ii) the probability  $p_2$  that the number of events in the interval  $[t_c, t_2]$  is greater than or equal to  $n_{post}$ ,

$$p_2 = Pr\{n \geq n_{post} | N, P\} = 1 - \sum_{n=0}^{n_{post}-1} \binom{N}{n} P^n (1-P)^{N-n} \quad (S3)$$

The binomial test assumes that each event is independent, with equal probability of occurrence in the interval  $[t_1, t_2]$ ;  $H_0$  is evaluated at a given significance level (e.g,  $s.l. = 0.05$ ), so that if  $p_1$  (or  $p_2$ )  $< s.l.$ , we conclude that there is evidence, with significance of  $s.l.$ , that the seismicity rate in the interval  $[t_c, t_2]$  decreased (or increased) with respect to the  $[t_1, t_c]$  seismicity rate.

This statistical test looks for potential significant seismicity rate changes correlated with the stop and re-start of the Cavone oil field's production activities. With this aim, in the experimentation period we identify three time intervals of interest ( $T1$ ,  $T2$ , and  $T3$  as in Figure 12), which correspond to the periods



preceding, during, and after the shutdown of industrial activities, respectively. The duration and number of events identified in these three time intervals are summarised in Table S5. If changes in seismicity rates are influenced by such changes in industrial operations, then we would expect that the rate of events in T2 exhibit some difference with respect to the rates observed in T1 or T3. We evaluated the possibility of observing after a given change point in industrial activity (i.e., stop or start) a number of events that is significantly lesser (Eq. S2) or greater (Eq. S3) than in the previous time interval. The results of this test are summarised in Table S6: in no case the p-values are small enough to reject the null hypothesis.

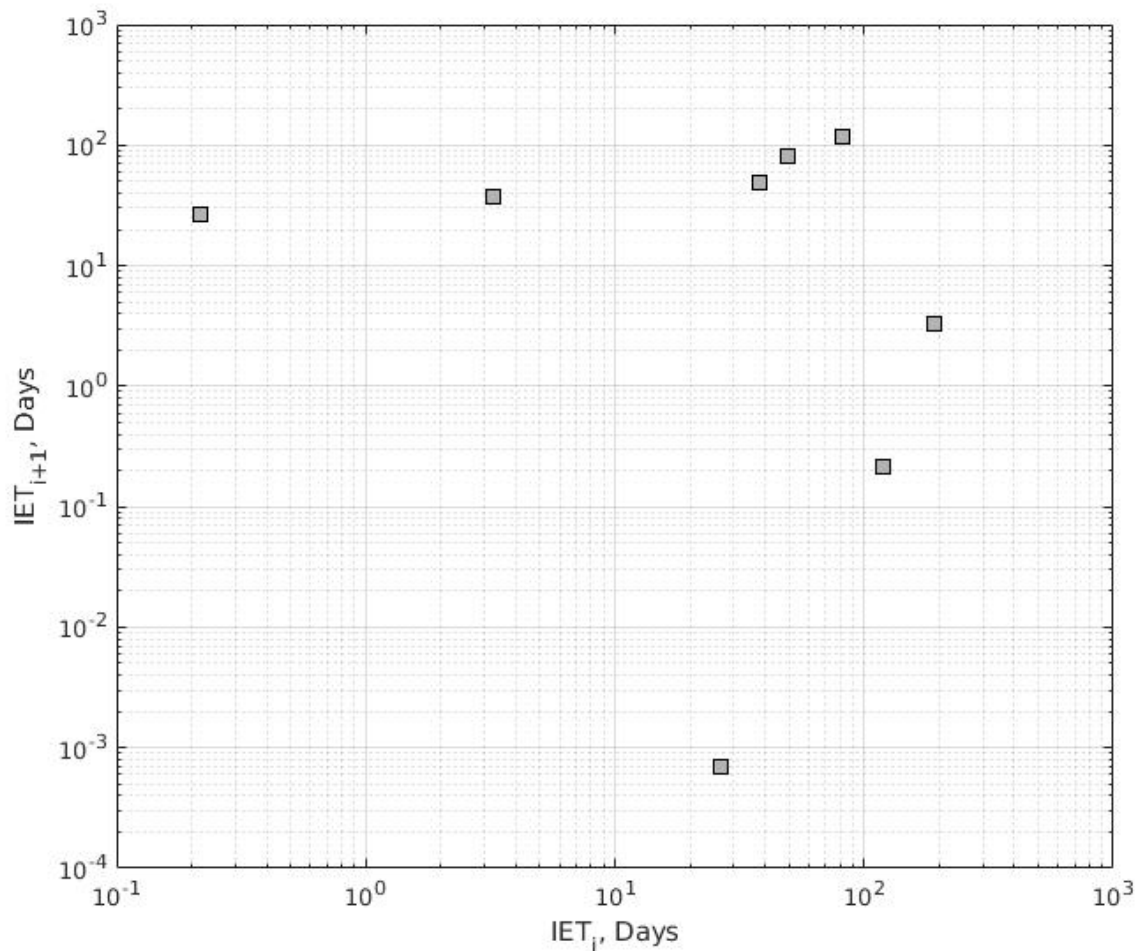

**Figure S6.** Plot of each IET versus the successive one, if there were a relationship it should be visible as a trend. We compute the Pearson ( $r^2$ ) and the Spearman ( $\rho$ ) coefficients testing for linear and not linear relationships, and obtaining  $r^2 = -0.2$ , with a p-value = 0.6, and  $\rho \sim 0$ , with a p-value  $\sim 1$ , thus rejecting any possible relationship between successive IET.

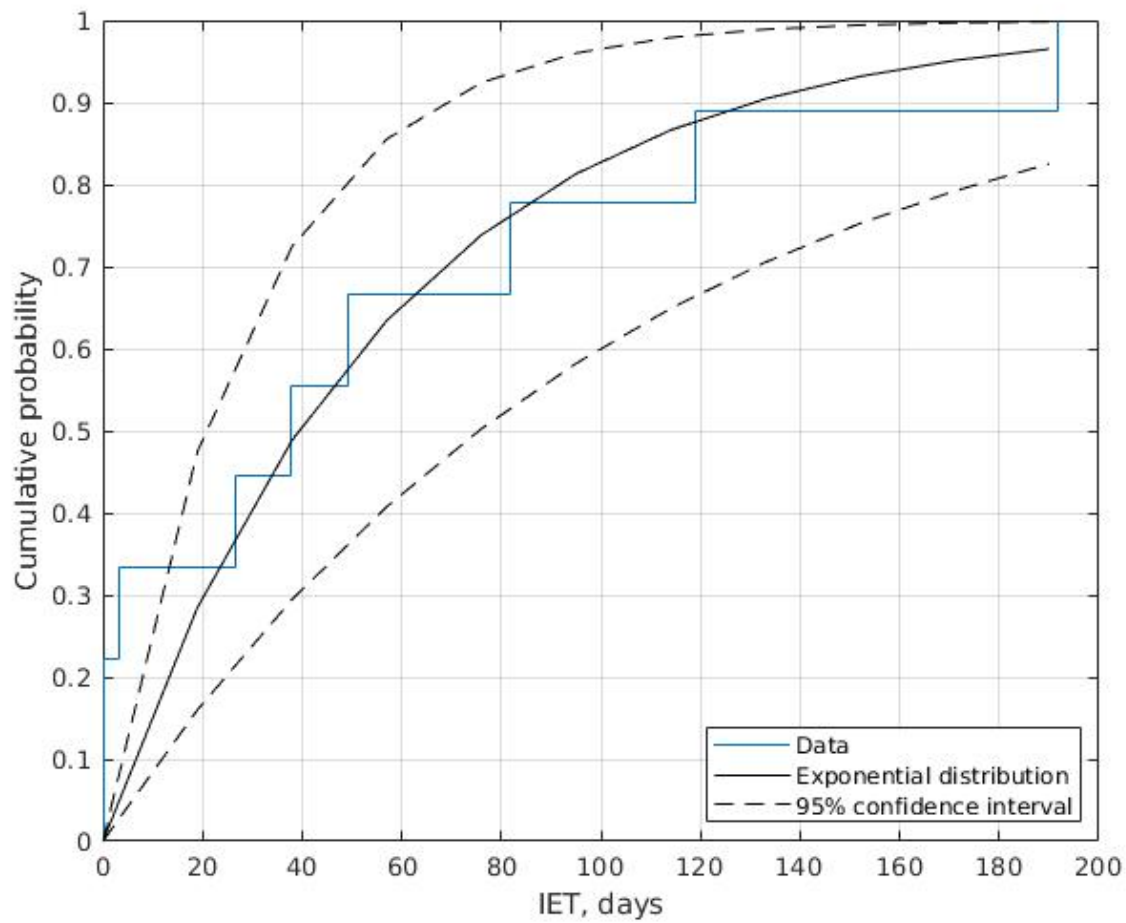

**Figure S7.** Plot of the cumulative distribution of the IET with comparison with the exponential probability distribution and its 95% confidence interval. The fact that our data fall inside this interval and that their  $CV = 1.1$ , ensure us about the possible exponential distribution of IET, thus confirming the seismic event independence.

| Time Interval | Start (day) | End (day) | Duration (days) | Number of Events |
|---------------|-------------|-----------|-----------------|------------------|
| <b>T1</b>     | 1           | 196       | 196             | 1                |
| <b>T2</b>     | 197         | 320       | 124             | 3                |
| <b>T3</b>     | 321         | 730       | 410             | 6                |

**Table S5.** Partition of the temporal intervals of interest in the monitoring period based on the industrial activity different stages. **T2** period identifies the shutdown period.

| Test between... | $p_1$ (Eq. S2)<br>(lesser rate) | $p_2$ (Eq. S3)<br>(greater rate) |
|-----------------|---------------------------------|----------------------------------|
| <b>T1 - T2</b>  | 0.98                            | 0.17                             |
| <b>T3 - T2</b>  | 0.33                            | 0.88                             |

**Table S6.** Results of the binomial test considering changes in industrial activity between **T1** and **T2**, and between **T3** and **T2**.

## REFERENCES

- Bebbington, M. S. (2012). Models for temporal volcanic hazard. *Statistics in Volcanology* 1, 1–24
- Garcia, A., Faenza, L., Morelli, A., and Antonucci, I. (2021). Can hydrocarbon extraction from the crust enhance or inhibit seismicity in tectonically active regions? a statistical study in Italy. *Frontiers in Earth Science* 9, 497. doi:10.3389/feart.2021.673124
- Govoni, A., Marchetti, A., and De Gori, P. (2014). The 2012 Emilia seismic sequence (Northern Italy): Imaging the thrust fault system by accurate aftershock location. *Tectonophysics* 622, 44–55. doi:10.1016/j.tecto.2014.02.013
- Leptokaropoulos, K., Staszek, M., Lasocki, S., Martínez-Garzón, P., and Kwiatak, G. (2017). Evolution of seismicity in relation to fluid injection in the North-Western part of The Geysers geothermal field. *Geophysical Journal International* 212, 1157–1166. doi:10.1093/gji/ggx481
- Marzocchi, W., Sandri, L., Heuret, A., and Funicello, F. (2016). Where giant earthquakes may come. *J. Geophys. Res. Solid Earth* 121. doi:10.1002/2016JB013054
- Peterson, J. (1993). Observation and modeling of seismic background noise. *U.S. Geol. Surv. Open-File Rept* 93, 94
- Wiemer, S. and Wyss, M. (2000). Minimum magnitude of completeness in earthquake catalogs: Examples from Alaska, the western United States and Japan. *Bull. Seismol. Soc. Am.* 90(4), 859–869
- Woessner, J. and Wiemer, S. (2005). Assessing the Quality of Earthquake Catalogs: Estimating the Magnitude of Completeness and Its Uncertainty. *Bull. Seismol. Soc. Am.* 95, 684–698
- Wonnacott, T. and Wonnacott, R. J. (1977). *Introductory Statistics* (Wiley)
